# Supplementary material for: Exploration of Piperidinols as Potential Antitubercular Agents
Source: MDPI journal article supplement (doi:10.3390/molecules191016274), 2014-10-10
Supplement: s1 [file s1]

## Supplementary Materials

**Figure S1.** The time-dependent inhibition of the MMNAT by the piperidinols (A) compounds **1**, **3**, **4**, **6** at 11.9  $\mu\text{M}$  concentration (B) **5**, **7** at 5.9  $\mu\text{M}$  concentration and (C) **8**, **9** (11.9  $\mu\text{M}$ ).

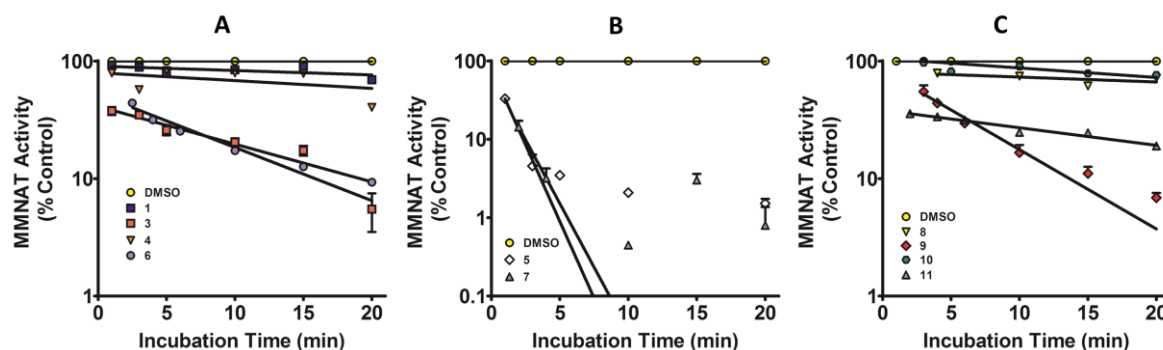

Semi-logarithmic plots showing the time-dependent inactivation of MMNAT by (A) compounds **1**, **3**, **4**, **6** at 11.9  $\mu\text{M}$  concentration (B) **5**, **7** at 5.9  $\mu\text{M}$  concentration and (C) **8**, **9** (11.9  $\mu\text{M}$ ), **10** (23.8  $\mu\text{M}$ ) and **11** (5.9  $\mu\text{M}$ ). The enzyme activity was measured using the protocol described in [1]. The results are presented as the mean  $\pm$  S.D. of triplicate measurements. The error bars are within the symbols. The residual activity is shown as a percentage of a control. The data were fitted against the incubation time using the Semilog line (X is linear, Y is Log) module of GraphPad Prism 5.0. The slope of each line is equivalent to  $(-k_{\text{obs}}/2.303)$  at each inhibitor concentration.

**Figure S2.** Correlation between  $t_{1/2}$  with the molar critical volume and cLogP of the piperidinols.  $t_{1/2}$ , the critical volume and cLogP values were obtained as described in Table 1. (A) No correlation was found between  $t_{1/2}$  and critical volume with  $r^2 = 0.04$  and  $p = 0.53$ . (B) No correlation was found between  $t_{1/2}$  and cLogP, with  $r^2 = 0.07$  and  $p = 0.43$ . The correlation coefficient (squared,  $r^2$ ) and p value were calculated by the Correlation module of GraphPad Prism 5.0.

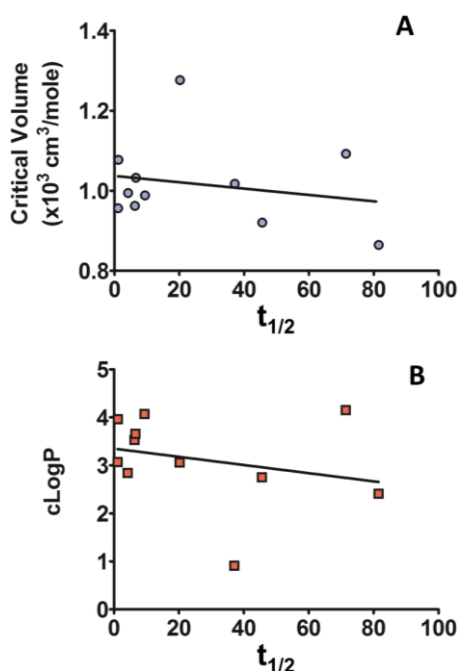

**Figure S3.** Electron density in active site of MMNAT.

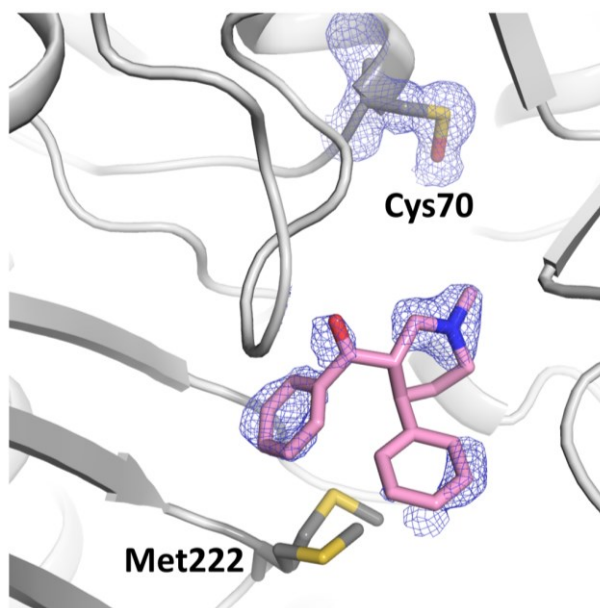

The excess 2Fo–Fc electron ( $0.9 \sigma$ ) observed in the MMNAT-1 complex (PDB entry 4c5p; [2]) obtained by soaking a crystal of MMNAT in 1 mM compound **1** dissolved in the mother liquor [2]. A model of compound **1** (in pink) docked in this electron density using COOT [3] is also shown. The electron density corresponds to the oxidation of the cysteine residue Cys70 into sulfenic acid (CSO70, occupancy 75%). The key amino acid residues are labelled. The figure was prepared using PyMOL [4].

**Figure S4.** The 3D-shape of compound **1** in comparison with the shapes of compounds **15** and **16**. The mesh view of the 3D-shape in form of Van der Waals surface of the query **1** conformer used in the *in silico* screen, the active hits **15** and **16**. The figure was prepared by using the DS Visualizer 3.1.

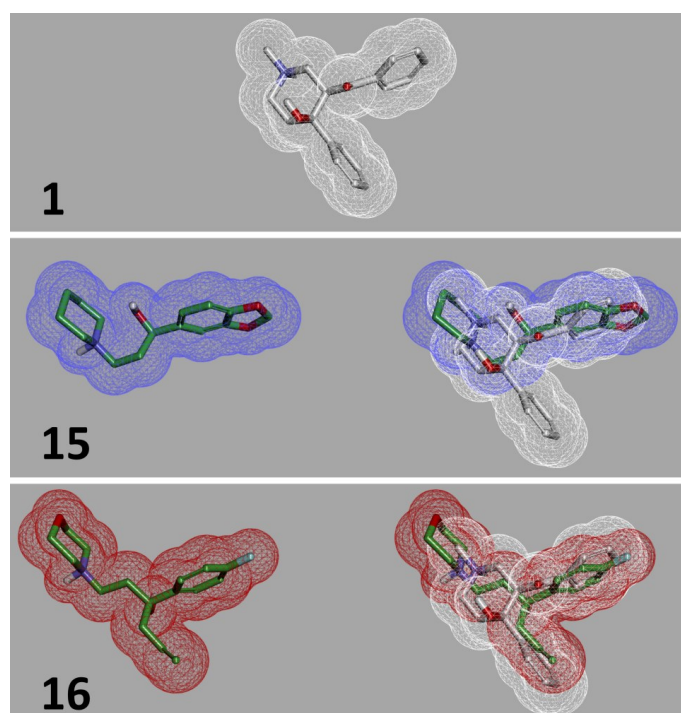

**Figure S5.** The Alamar blue assay of *M. bovis* BCG with **15** and INH as a control. The inhibition of *M. bovis* growth in liquid media was assessed from the colour change of the Alamar blue at 24 h of incubation as shown. A red colour indicates growth/resistance, and blue indicates no growth/sensitivity. The results are compared to those obtain with isoniazid (INH). MICs were determined visually. Note different scale.

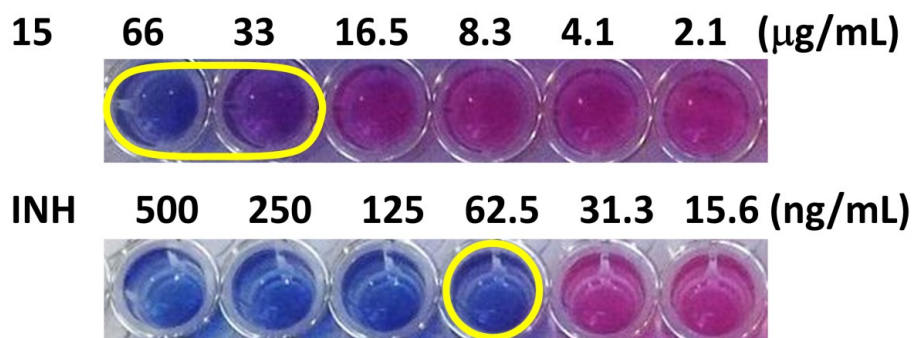

**Figure S6.**  $^1\text{H}$ -NMR (400 MHz  $\text{CDCl}_3$  Bruker AV400 spectrometer) of compound **1**.

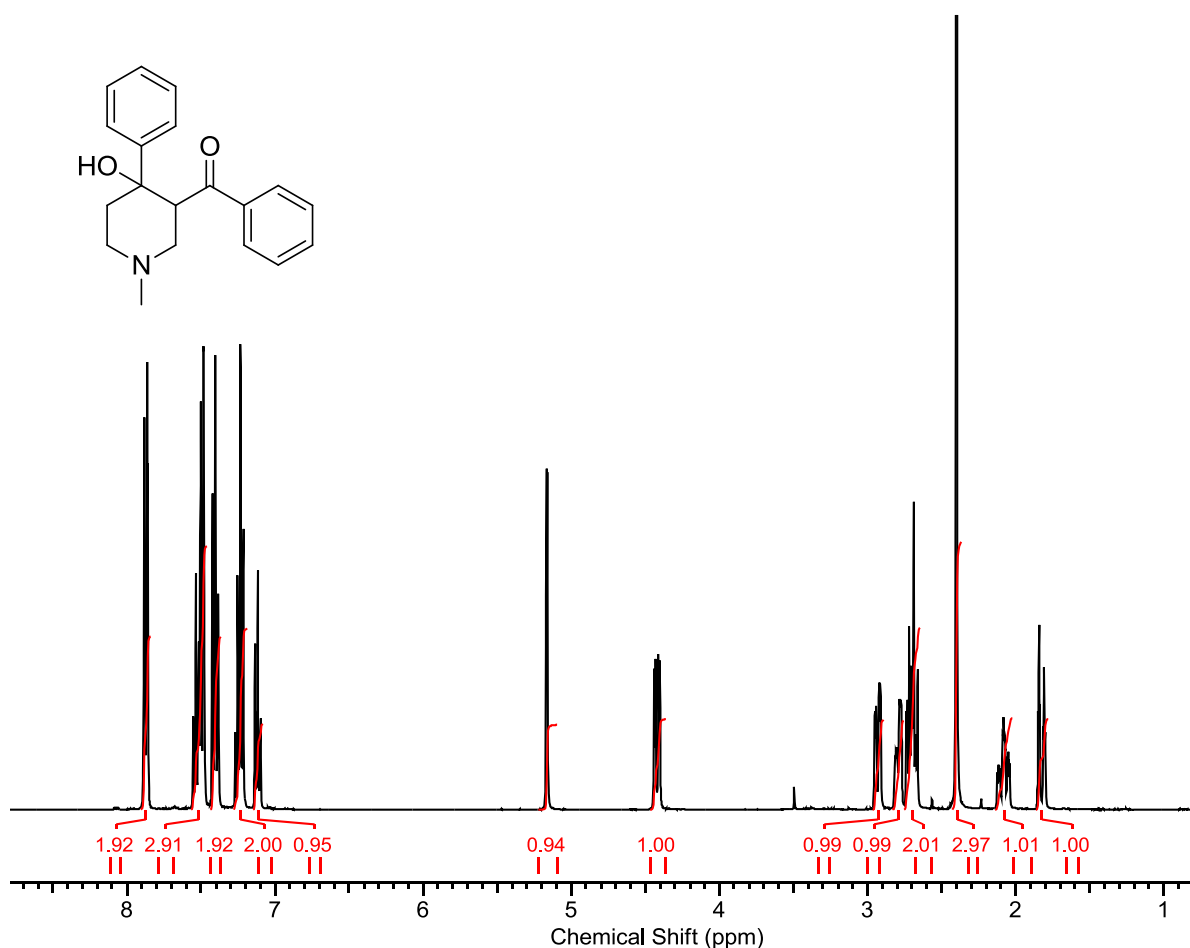

**Figure S7.**  $^{13}\text{C}$ -NMR(75 MHz  $\text{CDCl}_3$  Bruker DPX300 spectrometer) of of compound **2**.

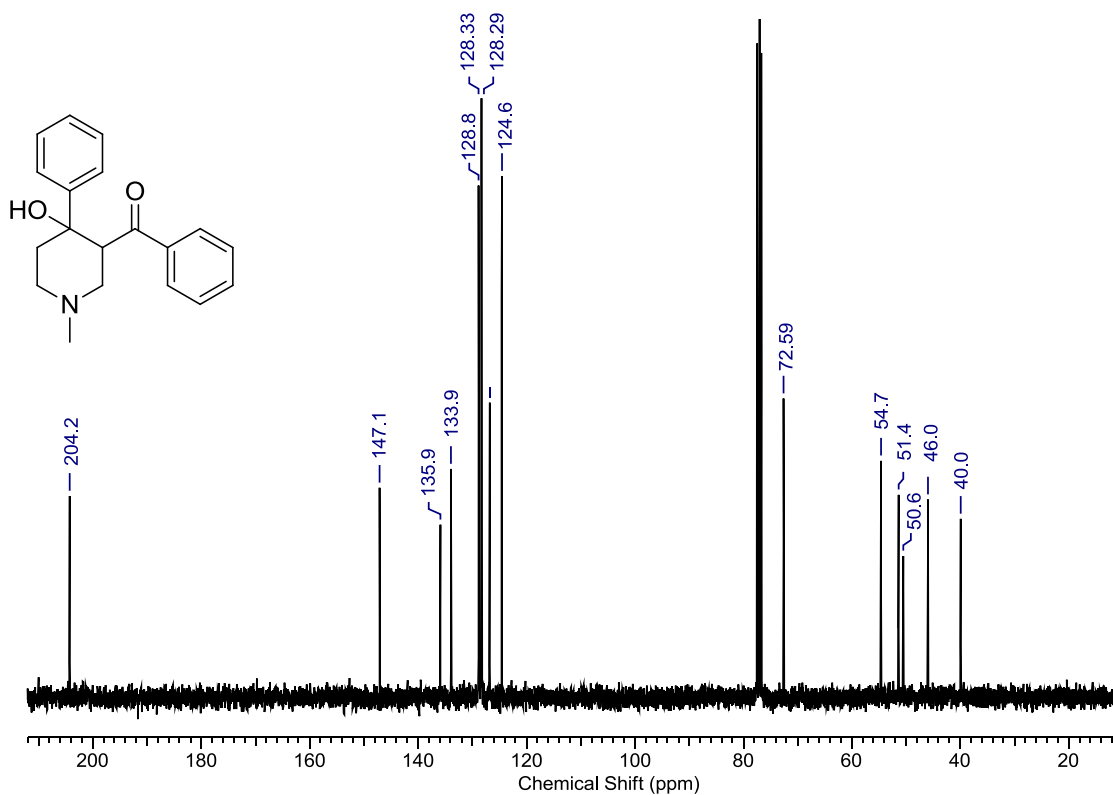

**Figure S8.**  $^1\text{H}$ -NMR(400 MHz  $\text{CDCl}_3$  Bruker AV400 spectrometer) of compound **3**.

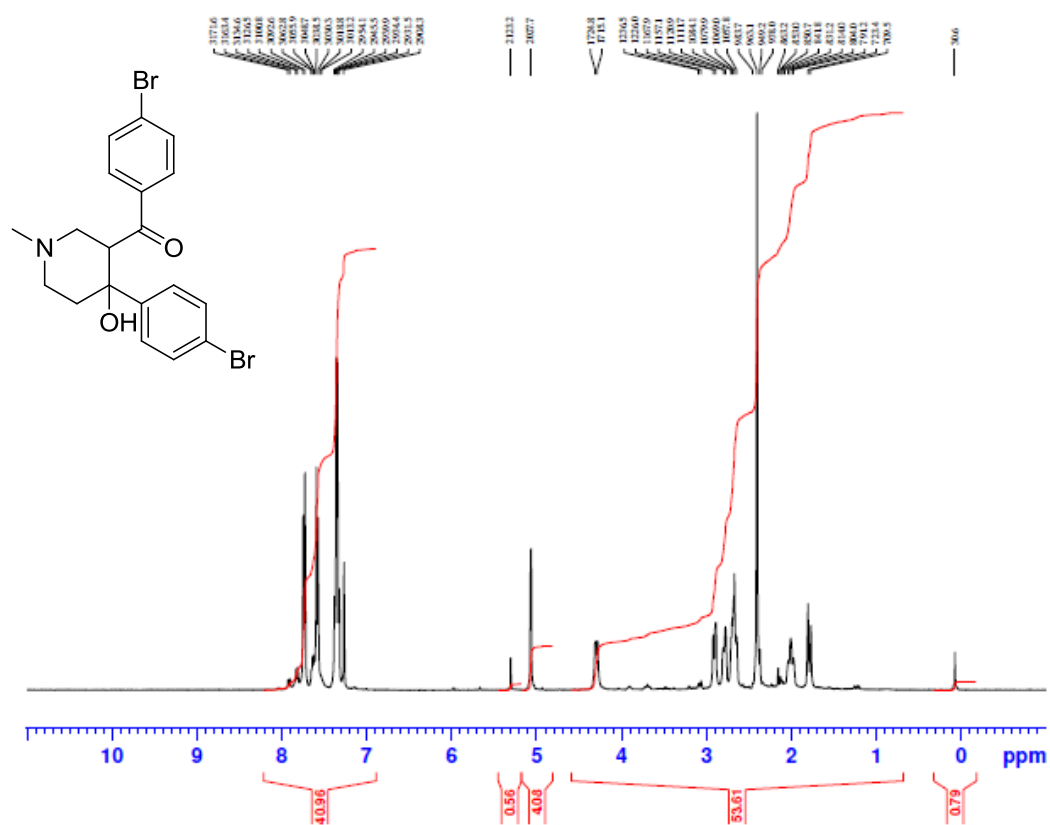

**Table S1.** The chemical scaffolds of the tested 3D-shape hits with their *in silico* scores and their experimental activities against TBNAT and MMNAT <sup>a</sup>.

| Code | Structure                                                                           | ElectroShape score | <i>In silico</i> hit rank | TBNAT        |                       | MMNAT        |                       |
|------|-------------------------------------------------------------------------------------|--------------------|---------------------------|--------------|-----------------------|--------------|-----------------------|
|      |                                                                                     |                    |                           | % Inhibition | IC <sub>50</sub> (μM) | % Inhibition | IC <sub>50</sub> (μM) |
| 1    | 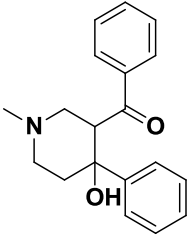   | 0.995              | 1                         | 101 ± 2      | 7.7 ± 0.9             | 105 ± 1      | 1.3 ± 0.0             |
| 12   |    | 0.949              | 8                         | 16 ± 5       | ND                    | 35 ± 3       | ND                    |
| 13   |   | 0.935              | 46                        | -17 ± 1      | ND                    | 23 ± 2       | ND                    |
| 14   |  | 0.931              | 68                        | -21 ± 3      | ND                    | 31 ± 5       | ND                    |
| 15   |  | 0.964              | 5                         | 86 ± 2       | 20 ± 3                | 103 ± 3      | 1.0 ± 0.1             |

Table S1. *Cont.*

| Code | Structure                                                                           | ElectroShape<br>score | <i>In silico</i><br>hit rank | TBNAT        |                                | MMNAT        |                                |
|------|-------------------------------------------------------------------------------------|-----------------------|------------------------------|--------------|--------------------------------|--------------|--------------------------------|
|      |                                                                                     |                       |                              | % Inhibition | IC <sub>50</sub><br>( $\mu$ M) | % Inhibition | IC <sub>50</sub><br>( $\mu$ M) |
| 16   | 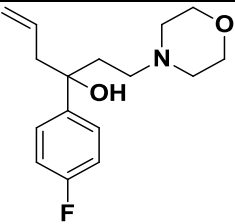   | 0.930                 | 70                           | $-14 \pm 3$  | ND                             | $99 \pm 1$   | $6.4 \pm 0.6$                  |
| 17   |    | 0.937                 | 76                           | $-35 \pm 1$  | ND                             | $12 \pm 2$   | ND                             |
| 18   |    | 0.923                 | 91                           | $14 \pm 6$   | ND                             | $16 \pm 2$   | ND                             |
| 19   |  | 0.931                 | 66                           | $11 \pm 6$   | ND                             | $10 \pm 1$   | ND                             |

Table S1. *Cont.*

| Code | Structure                                                                          | ElectroShape<br>score | <i>In silico</i><br>hit rank | TBNAT        |                                | MMNAT        |                                |
|------|------------------------------------------------------------------------------------|-----------------------|------------------------------|--------------|--------------------------------|--------------|--------------------------------|
|      |                                                                                    |                       |                              | % Inhibition | IC <sub>50</sub><br>( $\mu$ M) | % Inhibition | IC <sub>50</sub><br>( $\mu$ M) |
| 20   | 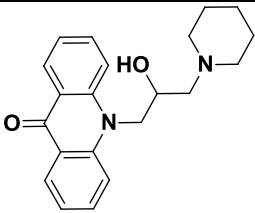  | 0.923                 | 90                           | 9 $\pm$ 7    | ND                             | 21 $\pm$ 4   | ND                             |
| 21   |   | 0.928                 | 76                           | -15 $\pm$ 4  | ND                             | 3 $\pm$ 3    | ND                             |
| 22   |   | 0.921                 | 100                          | 5 $\pm$ 1    | ND                             | 57 $\pm$ 1   | ND                             |
| 23   |  | 0.940                 | 24                           | -13 $\pm$ 1  | ND                             | 46 $\pm$ 2   | ND                             |

<sup>a</sup> Compound 1 was used as a query molecule. The rank of the hits, according to the ElectroShape scores, are shown alongside the corresponding scores. The NAT activity was measured by the NAT-inhibition assay using 150  $\mu$ M HLZ and 120  $\mu$ M Ac-CoA as substrates as described Methods. The percentage of enzyme inhibition was measured in the presence of 50  $\mu$ M inhibitor and compared to the un-inhibited control. The IC<sub>50</sub> values were determined by measuring the enzyme activity in the presence of variable concentrations of each inhibitor (0–250  $\mu$ M) and compared to the un-inhibited control. The results are presented as the mean  $\pm$  S.D. of triplicate measurements. ND is not determined. Inhibition curves obtained by non-linear fitting of the % inhibition and the inhibitor concentration ( $\mu$ M) using the Log(inhibitor) vs. response module of GraphPad Prism 5.0.

## References

1. Abuhammad, A.; Fullam, E.; Lowe, E.D.; Staunton, D.; Kawamura, A.; Westwood, I.M.; Bhakta, S.; Garner, A.C.; Wilson, D.L.; Seden, P.T.; *et al.* Piperidinols that show anti-tubercular activity as inhibitors of arylamine N-acetyltransferase: An essential enzyme for mycobacterial survival inside macrophages. *PLoS One* **2012**, *7*, e52790.
2. Abuhammad, A. Arylamine N-Acetyltransferases from Mycobacteria: Investigations of a Potential Target for Anti-Tubercular Therapy. Ph.D. Thesis, University of Oxford, Oxford, UK, April 2013.
3. Emsley, P.; Lohkamp, B.; Scott, W.G.; Cowtan, K. Features and development of Coot. *Acta Crystallogr., Sect. D: Biol. Crystallogr.* **2010**, *66*, 486–501.
4. Schrodinger, LLC. *The PyMOL Molecular Graphics System*, version 1.3r1; Schrodinger, LLC: Camberley, UK, 2010.
